# Supplementary material for: Boosting neuraminidase immunity in the presence of hemagglutinin with the next generation of influenza vaccines
Source: PubMed Central journal article supplement (PMC11577023; doi:10.1038/s41541-024-01011-x), 2024-11-19
Supplement: 41541_2024_1011_MOESM1_ESM.pdf [file 41541_2024_1011_MOESM1_ESM.pdf]

1 **Supplementary materials**

2

3 **List of rHAs used in the antibody forensics assay in this study**

4 H3 antibody forensics panel: A/URUGUAY/716/2007, A/VICTORIA/361/2011,  
5 A/HONGKONG/4801/2014, A/SINGAPORE/INFIMH-16-0019/2016,  
6 A/BRISBANE/1059/2017, A/ETHIOPIA/1877/2017, A/KENYA/105/2017,  
7 A/MISSOURI/37/2017, A/MIYAZAKI/89/2017, A/OSORNO/60580/2017,  
8 A/SAPPORO/46/2017, A/SHANGHAIXUHUI/1373/2017, A/SYDNEY/1093/2017,  
9 A/SYDNEY/1013/2017, A/AKSARAY/4048/2016, A/ALBANIA/7165/2016,  
10 A/ANKARA/4110/2016, A/BRETAGNE/2836/2016, A/BRISBANE/1009/2016,  
11 A/CALIFORNIA/168/2016, A/CHIBA/33/2016, A/CHRISTCHURCH/513/2016,  
12 A/GUANGXIQIXIN/328/2016, A/HAWAII/67/2016, A/JORDAN/J16420301NT/2016,  
13 A/KAWASAKI/142/2016, A/KHMELNITSKY/719/2016, A/LAOS/F2884/2016,  
14 A/LINKOU/0051/2016, A/LISBOA/NIEVA063/2016, A/MARTINIQUE/531/2016,  
15 A/MARYLAND/24/2016, A/MEKNES/168/2016, A/MICHIGAN/84/2016,  
16 A/PORTUGAL/MS68/2016, A/SAUDIARABIA/192150/2016,  
17 A/SHANDONGLAICHENG/1763/2016, A/SINGAPORE/GP2366/2016,  
18 A/TASMANIA/97/2016, A/TOWNSVILLE/51/2016.

19 H1 antibody forensics panel: A/CALIFORNIA/07/2009, A/BAYERN/69/2009,  
20 A/HONGKONG/34079/2009, A/HONGKONG/33597/2009, A/LVIV/N6/2009,  
21 A/MONTPELLIER/2051/2009, A/CHRISTCHURCH/16/2010, A/ANKARA/TR40/2011,  
22 A/ASTRAKHAN/1/2011, A/HONGKONG/3934/2011, A/GOTEBORG/1/2011,  
23 A/MEXICO/2208/2011, A/HONG/KONG/5659/2012, A/STOCKHOLM/25/2012,  
24 A/ISRAEL/Q504/2015, A/MICHIGAN/45/2015, A/HUNGARY/12/2016,  
25 A/BRATISLAVA/342/2016.

26 **Table S1.** Severity score and score definitions of the peak body weight loss, the peak of body temperature rise and the AUC for  
27 virus shedding.

| <b>Severity score</b> | <b>Peak body weight loss (%)</b>   | <b>Peak temperature rise (°C)</b> | <b>AUC virus shedding</b> |
|-----------------------|------------------------------------|-----------------------------------|---------------------------|
| 0 (Normal)            | Weight increase or less than -3.42 | <0.7                              | <8.375                    |
| 1 (Mild)              | [3.42–5.56]                        | [0.7–0.9]                         | [8.375–13]                |
| 2 (Marked)            | [5.56–7.46]                        | [0.9–1.4]                         | [13–18.5]                 |
| 3 (Severe)            | >7.46                              | >1.4                              | >18.5                     |

28 AUC, area under the curve

29

30 **Figure S1.** Immunogenicity of A/Singapore/INFIMH-16-0019/2016 N2 and A/Michigan/45/2015 N1 rTET-NA, LVNA and IIV  
 31 preparations was tested in naïve mice. Female BALB/c mice (n=8 per group) were immunized twice intramuscularly and terminally  
 32 bled 2 weeks after second immunization as shown in Figure 2A. Sera were collected two weeks after booster vaccination; sera pools  
 33 from two animals were created and in turn tested via ELISA to assess NA-binding antibody titers using A/Singapore/INFIMH-16-  
 34 0019/2016 N2 rTET-NA (A) or A/Michigan/45/2015 N1 rTET-NA (B) as coating antigens, respectively. ○ symbol represents EC<sub>50</sub>  
 35 antibody titers without AF03 addition and ■ represents groups with AF03 addition. The dashed line indicates the starting serum  
 36 dilution used for testing. \*p <0.05; \*\* p<0.01; \*\*\* p<0.001 (the red text/symbols are comparisons vs adjuvanted PBS/control). For  
 37 comparisons between adjuvanted and non-adjuvanted matched dose and formulation, all were significant with p <0.001 (except for  
 38 LVNA 0.2μg [p<0.05] and IIV 1 μg [p <0.01] A/Singapore/2016 N2). LLOD: Lower limit of detection

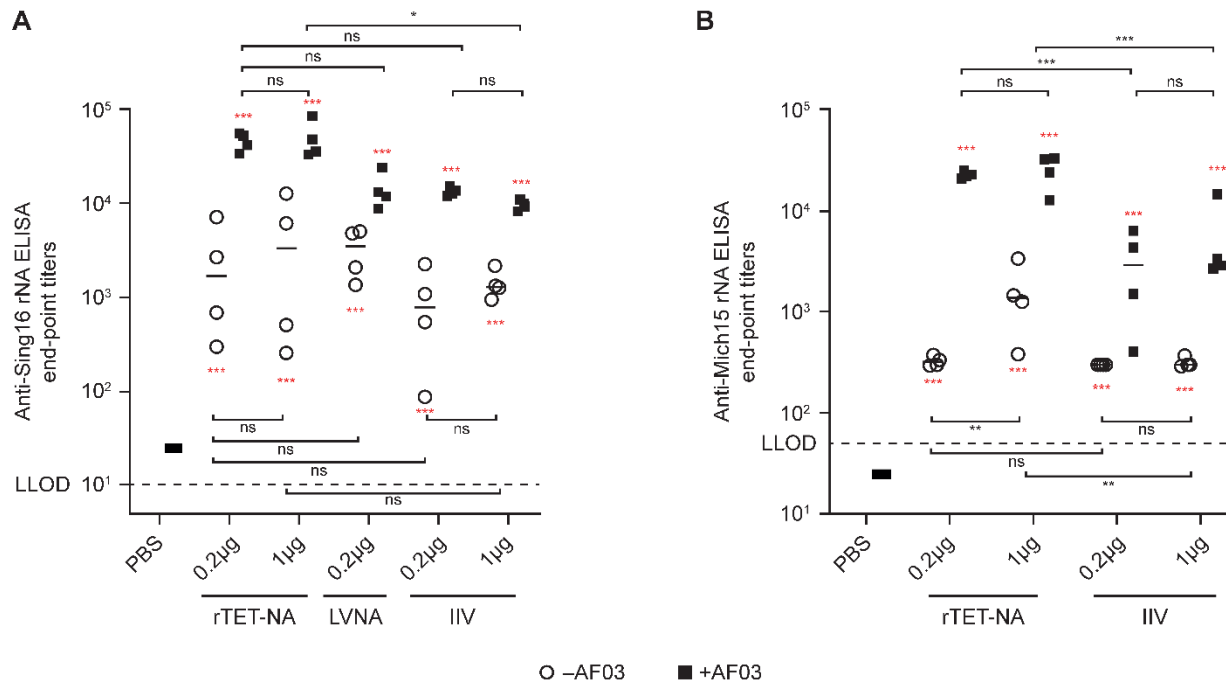

40 **Figure S2.** rTET-NA retains its immunogenicity following octavalent HA and NA vaccination in ferrets. NA-binding antibody  
 41 titers against vaccinal N2, N1, B/Victoria-like and B/Yamagata-like strains were determined in sera from vaccinated ferrets three  
 42 (3) weeks after each immunization via ELISA using corresponding rTET-NA as coating antigens. For all comparisons between 1  
 43 dose and 2 doses, all NA containing groups had similar or higher NA-binding antibody titers after 2 doses, while no difference or  
 44 higher NA-binding titers were observed upon addition of 4x HA, statistical analysis pending. NT: Not tested. LLOD: Lower limit of  
 45 detection

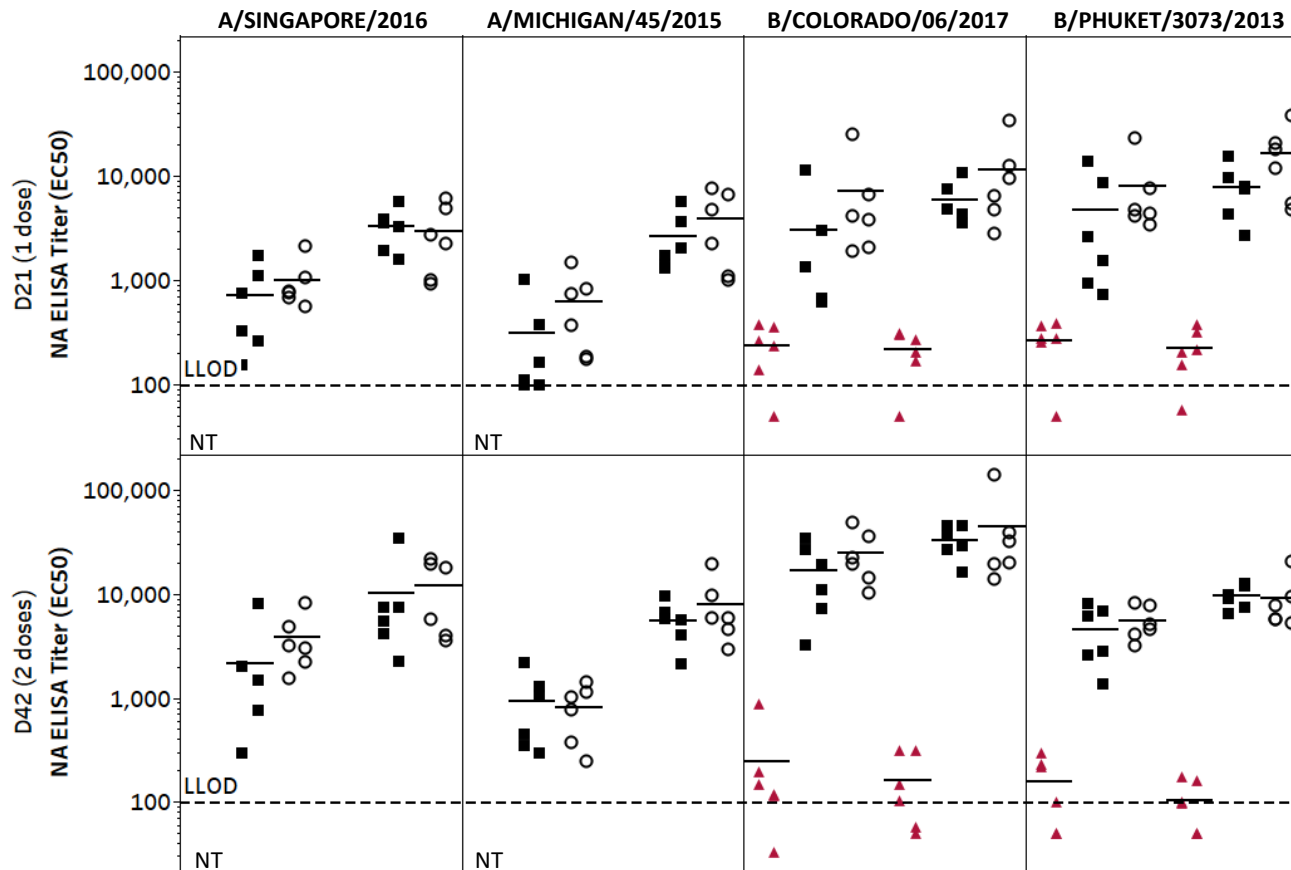

47 **Figure S3.** Post-vaccination NA-binding antibody titers are a correlate of protection in the ferret model. Pre-challenge PE09 anti-  
 48 N2 NA-binding antibody titers were measured in sera collected three weeks after the second vaccination via ELISA using PE09  
 49 rTET-NA as coating antigen (A). ROC curve (B) and distribution of the pre-challenge NA ELISA titers according to severity score  
 50 (C).

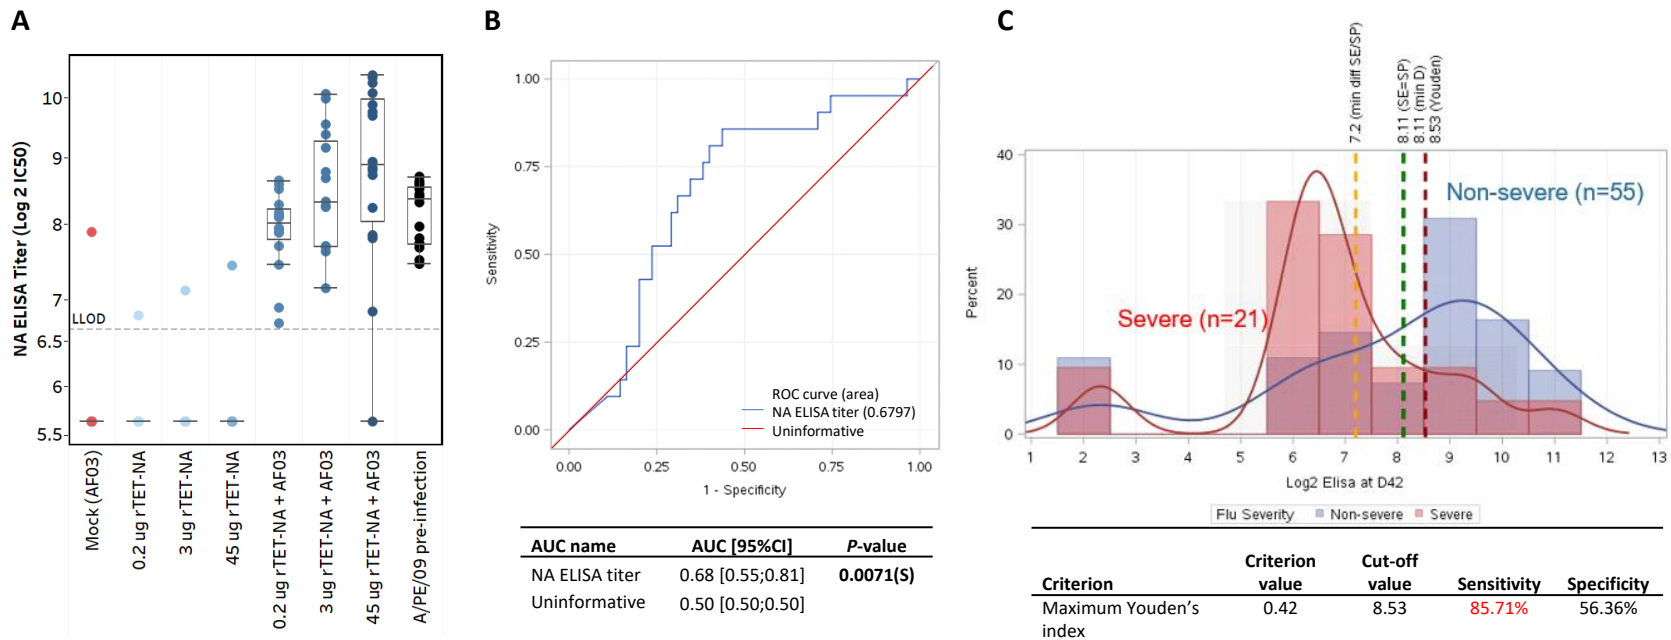

51

52
